# Supplementary material for: An optimized approach to germ-free rearing in the jewel wasp Nasonia
Source: PeerJ. 2016 Aug 9;4:e2316. doi: 10.7717/peerj.2316 (PMC4991892; doi:10.7717/peerj.2316)
Supplement: Data S1 [file peerj-04-2316-s002.xlsx]

## Sheet: Survival and Adult Eclosion
Replicate 1 by JDS											Replicate 2 by EVO
			Number of living Nasonia in transwell insert			Dead Nasonia		Adult Eclosion Calculations					Number of living Nasonia in transwell insert
Treatment	Plate	Well	Day 3	Day 6	Day 14	Remainder (Day 20)		(D3-D20)	(D3-D20)/D3		Treatment	Well	Day 3	Day 6	Day 14
NRMv1	1	1	20	19	18	14		6	0.3		NRMv1	1	24	21	19
NRMv1	1	2	10	10	10	10		0	0		NRMv1	2	14	14	13
NRMv1	1	3	19	17	17	19		0	0		NRMv1	3	21	21	18
NRMv1	1	4	19	19	17	19		0	0		NRMv1	4	32	28	23
NRMv1	1	5	18	15	10	13		5	0.277778		NRMv1	5	19	16	14
NRMv1	1	6	19	17	16	15		4	0.210526		NRMv1	6	26	19	13
NRMv1	1	7	34	26	22	27		7	0.205882		NRMv1	7	32	26	22
NRMv1	1	8	22	20	19	17		5	0.227273		NRMv1	8	16	15	15
NRMv1	1	9	12	12	12	11		1	0.0833333		NRMv1	9	16	14	11
NRMv1	1	10	17	17	17	17		0	0		NRMv2	1	28	23	23
NRMv1	1	11	15	15	12	14		1	0.0666667		NRMv2	2	21	21	20
NRMv1	1	12	19	19	14	14		5	0.263158		NRMv2	3	23	21	19
NRMv2	2	1	20	20	18	20		0	0		NRMv2	4	23	21	16
NRMv2	2	2	11	11	6	7		4	0.363636		NRMv2	5	34	27	26
NRMv2	2	3	22	18	14	15		7	0.318182		NRMv2	6	11	10	9
NRMv2	2	4	20	18	16	13		7	0.35		NRMv2	7	29	28	24
NRMv2	2	5	17	17	16	17		0	0		NRMv2	8	31	24	22
NRMv2	2	6	20	17	14	13		7	0.35		NRMv2	9	25	25	21
NRMv2	2	7	17	16	16	12		5	0.294118		NRMv2	10	8	8	8
NRMv2	2	8	19	19	18	13		6	0.315789		NRMv2	11	35	30	25
NRMv2	2	9	25	20	18	19		6	0.24		NRMv2	12	31	25	23
NRMv2	2	10	25	21	21	11		14	0.56		NRMv2	13	24	24	22
NRMv2	2	11	18	18	16	12		6	0.333333
NRMv2	2	12	19	18	16	13		6	0.315789
NRMv1	3	1	17	17	14	12		5	0.294118
NRMv1	3	2	22	22	22	20		2	0.0909091
NRMv1	3	3	15	15	13	11		4	0.266667
NRMv1	3	4	22	22	19	15		7	0.318182
NRMv1	3	5	16	16	14	14		2	0.125
NRMv1	3	6	24	23	23	19		5	0.208333
NRMv1	3	7	24	12	12	12		12	0.5
NRMv1	3	8	20	20	19	16		4	0.2
NRMv1	3	9	20	19	17	15		5	0.25
NRMv1	3	10	23	20	20	16		7	0.304348
NRMv1	3	11	21	21	21	21		0	0
NRMv1	3	12	12	12	12	11		1	0.0833333
NRMv2	4	1	18	18	16	16		2	0.111111
NRMv2	4	2	22	22	22	16		6	0.272727
NRMv2	4	3	23	22	22	16		7	0.304348
NRMv2	4	4	19	13	12	16		3	0.157895
NRMv2	4	5	15	15	15	14		1	0.0666667
NRMv2	4	6	23	19	18	11		12	0.521739
NRMv2	4	7	17	16	16	9		8	0.470588
NRMv2	4	8	17	17	17	17		0	0
NRMv2	4	9	21	20	18	10		11	0.52381
NRMv2	4	10	23	15	12	13		10	0.434783
NRMv2	4	11	23	22	22	15		8	0.347826
NRMv2	4	12	25	23	20	11		14	0.56

## Sheet: Larval Growth (Day3)
	Day 3
	Plate 1	NRMv1												Plate 2	NRMv2												Plate 3	NRMv1												Plate 4	NRMv2
	well 1	well 2	well 3	well 4	well 5	well 6	well 7	well 8	well 9	well 10	well 11	well 12		well 1	well 2	well 3	well 4	well 5	well 6	well 7	well 8	well 9	well 10	well 11	well 12		well 1	well 2	well 3	well 4	well 5	well 6	well 7	well 8	well 9	well 10	well 11	well 12		well 1	well 2	well 3	well 4	well 5	well 6	well 7	well 8	well 9	well 10
	1.4	1.1	1.4	2.3	2.2	2.2	2.2	2.2	1	1.3	0.9	2.4		1.8	1.7	2.2	2.6	1.7	2.5	2.4	1.1	2.6	2.5	1.8	2.6		2.6	2	1.4	2.7	2.7	1.8	1.1	2.1	2.5	1.6	2.4	1.6		1.8	2.7	1.5	2	1	1.6	2.1	1.5	1.3	0.9
	2.1	1.3	1.2	2.5	1.7	1.6	1.7	2	0.8	1.6	1.5	1.9		2	2.9	2.3	2.9	2	0.6	1	0.8	2.4	2.6	1.6	2.8		2.9	2.1	1.6	1.4	1.7	1.4	1	1.5	3	1.5	1.1	3		1.2	1.4	1.6	2.7	1.7	1.5	2.5	2.5	1.5	1.5
	0.9	1	1.5	1.1	2.4	0.8	2	1.8	0.6	1.7	0.6	1.4		1.6	1.5	2.8	1.6	2	1.7	2.4	0.8	1.8	2.4	1.3	2.6		2.6	2.2	0.9	1.3	2.1	2.6	1.7	1.1	2	1.5	1.8	2.2		1.2	2.1	1.5	1.7	1.7	1.7	0.9	0.7	2.1	1.2
	1.7	1.5	1.7	2.2	2.5	2.3	1	2.1	1.4	1.4	0.6	1.6		2	1.9	1.9	1.8	1.6	1.6	2.7	2.2	1.3	2.3	0.9	1.6		2.2	1.5	2.5	3.2	2	2.2	0.9	2.5	1.8	1.6	1.2	1.5		0.9	2.4	1.4	1	2.4	1.6	2.1	1.3	2.2	1.1
	1.3	2	1.2	2.3	2.2	1.8	1.7	1.3	0.8	1.5	0.5	2.1		1.6	2.9	1.5	1.3	2.5	1.8	2.1	1.6	1.8	1.5	1.8	1.4		1.9	1.5	1.3	1.7	1.1	1.7	0.8	1.5	2.8	1.3	1.5	2.6		1.5	2.4	1.7	1.7	2	1.4	1.5	1.1	2	1.4
	1.7	1.4	2	2.1	1.9	1.1	1.3	2.2	1.4	0.7	1.4	2		0.9	2.6	1.6	1.5	1.2	1	2.4	1.4	2.6	1.5	1.7	2.3		1	1.7	2.7	2.3	1.7	1.8	2.9	1.7	1.9	1	0.8	2.1		1.3	2	1.8	2.2	1.1	2.4	1.5	1.3	1.6	1.8
	1.5	1.2	1.5	1.9	1.6	1.4	1.5	1.3	0.8	2.1	2.2	2.1		1.2	2.8	1.4	2.5	1.4	2.4	2.4	2.6	2.2	1.4	1.6	2.9		2.6	1.7	2.6	1.7	1.4	1.7	1	1.7	3.2	1.6	1.4	1		2.2	2.6	1.1	1.7	1.8	1.7	1.5	0.7	2.2	1.2
	1.4	0.9	1.8	2	2.1	1.1	2.1	1.8	1.2	2	1.1	2.3		1	1.4	1.7	1.1	2.3	1.8	1.2	1.4	2.3	1.4	2.2	2		2.4	2.7	2	2	1.4	3.2	1.1	2.8	1.3	0.8	1	2.8		2.2	2.3	1.7	1.4	1.8	1.3	1.6	1.3	1.5	1.2
	1.4	0.8	1.7	1.2	1.4	2	2.1	1.8	0.9	1.5	1.6	1.9		0.9		1.4	3	1.9	1.3	2.2	1	1.8	1.9	1.8	1.5		1.5	1.7	1.8	1.8	1.9	1	0.8	2.8	1	0.9	1.8	2.1		1.1	1.7	1.5	0.9	1.4	1.5	2.1	2.2	2.3	1.2
	1.2	0.8	1.7	1.3	2.6	0.8	1.1	1.9		1.7	1.6	1.2		1.5		1.5	1.2	2	1.3	1.2	1.7	2.2	2.6	1.3	1.4		3.4	2.5	2.5	1.1	2.1	1.1	1	1	1.5	1.4	0.9	0.9		1.7	2.5	1.6	0.6	2.3	1.8	1.7	1.2	1.5	1.7
	2	0.6	1.6	1.9	2.3	1.5	1.9	1.2		1	1.4	2.1		2.4		2.5	1.4	1.5	1.3	1.3	2.1	1	2.6	1.9	2.1		1.8	1.5	1.6	0.7	1.4	1.1	2.4	1.6	1.2	0.9	1.3			2	1.1	1.6	1	2	1.8	1.5	2	1.8	1
	1.8		0.9	1.5	1.8	1.1	1	1		1.2	1.9	2		1.7		1.5	1.7	1.9	2.2	1.5	1.6	1.1	2.1	1.2	1.8		1.8	1.7	1.3	2.8	1.9	2.6	1	2.1	2.7	0.7	1.3			1.3	2	1.7	1	2.3	0.8	1.6	2	2.5	1.3
	2.2		1.8	1.2	2.1	1.4	1.1	1.8		0.9		1.9		1.8		1.9	1.5	1.7	1.8	1.2	1.8	1.5	1.4	1.3	2.2		2.9	2.6		2.6	1.6	1.7	2.3	2.2	2.3	1.1	1.4			1.2	1.8	1.8	1.6	1.4	1.7	1.7	1.4	1.7	1.7
	2		1.5	1.8	2.1	0.7	0.8	1.3		0.6		2.1		1.6		2	2.9		1.1	1	1.5	2	1.9	1.3	2.6		1.6	2.1		1.1	1.4	2.1	2.4	1.9	1.2	1.4	1			1.6	2.4	1.7	1.6	1.2	0.9	1.9	1.4	2.1	1.8
	1.3		1.1	1.5	1.5	1.4	1.1	2.9		1		2.5		0.7		2.4	2.1		1.2	2.4	1.1	1.6	1.6	1.6	0.9		3.2	1.4		2.8	1.5	1.3	1.1	1.3	1.9	1.2	1.3			1.7	1.7	2.7	1.2	1.8	0.9		1.8	1	1.4
	1.1		0.8	1	1.9	1	1.9	2		1.3				1.1		2	1.5		1.7	2.2	1.5	1.2	3.1	0.8	1.5		2.6	1.3		2.4		2.1	1.6	2	2.8	0.9	1.7			1.2	2.9	1.7	1.3		1.8		1.6	1.4	1.1
	1.3		1.2		2.4	17	0.7	1.9		1.6						1.8	1.7		1.5	2.1	1.5	1.2	2.2	1	1.2		2.5	2.6		2.7		2.1	2.7	1.7	2.9	1.4	1.7			1.3	2.4	1.2	2.2		1.7			2	1.3
	1.2		1.1		1.2	18	1.3	2.5		0.6						1.6	1.8		0.8	1.8	1	3	1.9		1.4			2.2		2.4		2.5	1	1	1.6	1.3	1.8			2.1	1.7	1.8	1.6		1.8			1.8	1.6
	0.5		2.4				0.7	2								1.7	1.2		1.2	1.1	1.5	1.7	2		1.3			1.2		2.8		2.5	1.5	1.5	1.1	1.1	1.8					1.7	2.1		2.2			2.1	0.8
	1.1						1.7	2.3								1.7	1.8		2.2		1.6	1.3	1.4					2.4		2.7		2.6	0.7	1.6	2.7	2.5	1.5					2.6	1.2		1.3			1.5
	1.3						1.4	2.2								1.4			1.7		1.5	1.6	1.3					2.5				1.7	1.3		1.5	2.3	1.5					1.4	1.5		2.4			1.4
	1.6						0.7	1.7								1.2						1.6	2.3									2.6	1			1.7						1.8			1.2			1.8
							1.8	1.8								1.5						1.2	2.6									2	0.9			3						1.5			0.9
							1.8															2	2.8									2.3	2.3
							1.7															2.1	2.5										0.9
							1.1															2.1
							1.2															2.3
							1.2
							1.3
							1.2
							1.5
							0.8
							0.8
							0.9
							1.5
							0.8
							1.7
Average	1.45455	1.14545	1.47895	1.7375	1.99444	3.17778	1.35946	1.86957	0.988889	1.31667	1.275	1.96667		1.4875	2.2125	1.80435	1.855	1.82308	1.55714	1.82105	1.49048	1.83333	2.072	1.47647	1.9		2.32353	1.95714	1.85	2.11	1.72667	1.9875	1.416	1.78	2.04286	1.42174	1.4381	1.98		1.52778	2.11667	1.67826	1.53333	1.72667	1.56087	1.72857	1.5	1.78636	1.32632
[truncated: 2 more columns]

## Sheet: Larval Growth (Day6)
	Day 6
	Plate 1	NRMv1												Plate 2	NRMv2												Plate 3	NRMv1												Plate 4	NRMv2
	well 1	well 2	well 3	well 4	well 5	well 6	well 7	well 8	well 9	well 10	well 11	well 12		well 1	well 2	well 3	well 4	well 5	well 6	well 7	well 8	well 9	well 10	well 11	well 12		well 1	well 2	well 3	well 4	well 5	well 6	well 7	well 8	well 9	well 10	well 11	well 12		well 1	well 2	well 3	well 4	well 5	well 6	well 7	well 8	well 9	well 10
	2.3	2.8	2.2	2.5	2.6	2.9	2.2	2.2	3.3	3.1	2.2	1.6		2.8	3	2.6	2.5	2.7	2.6	2.6	2.5	2.4	1.6	3.2	2.6		1.8	2.3	2.5	2.8	2.5	2.6	2.7	2.4	3	2.1	2.1	2.6		2.7	2.9	2.4	2.7	2.5	2.4	3	2.7	2.8	2.4
	2.6	3.1	1.5	2.4	2.8	2.7	2.3	2.7	2.5	2.9	2.6	2		2.7	2.8	2.9	2.7	2.7	1.9	2.4	2	3.1	1.8	2.3	2.4		2.8	2.3	1.9	2.7	2.9	2.3	1.1	2.5	2.2	2.6	2.2	2.3		3.4	2.9	2.5	3.1	2.4	2.7	2.5	2.1	2.8	2
	2.4	3.1	2.5	2.2	2.4	1.9	1.9	2.9	2.7	2.4	2.6	1.7		2.2	2.3	3	2.9	1.7	2.2	1.9	2	2.6	2.3	2.2	1.5		2.4	1.6	2	2.8	2.6	1.5	3.1	2.9	2.6	2.1	1.5	2.7		2.3	2.8	2.4	2.7	2.8	1.7	2.7	2	1.7	1.9
	2.2	2.8	2.9	1.9	2.6	2.1	2.2	2.1	1.8	2.7	3.1	2.1		2.3	2.6	2.9	1.9	2.5	1.8	2.9	2.6	2.8	2.3	1.9	2.6		3	2.6	1.9	2.1	3.4	1.5	2.3	2.6	2.8	2.2	2.4	2.5		3	2.4	2.7	2.9	3.1	2.9	1.7	1.9	1.6	2.8
	2.5	2.3	2	2.6	2.8	2.8	3.1	2.4	2	2.7	1.6	1.8		2	2.8	2.1	2.6	2.6	1.5	2.3	2.5	2.5	2.4	2.4	2.7		3.2	2.6	3.1	2.7	2.8	2.4	2.9	2.8	2.6	2.2	2.5	2.6		2.5	2.7	2.4	3	2.6	2.1	2.8	2.2	2.9	2.7
	2.5	1.9	3	2.9	3.2	2.7	1.9	2.4	2.4	2.8	2.7	1.1		1.5	2.4	3	2.6	3.2	1.9	1.6	2.4	1.9	2.9	2.2	2.8		2.3	2.4	2.1	2.7	2.1	3.3	2.7	1.6	2.5	2.4	1.5	1.6		3.1	2.6	2.2	3.2	2.9	3.1	2.5	1.8	3.2	2.3
	1.7	2.7	2.1	2.8	2.4	2.6	2.9	3.3	2.5	2.6	2	2.6		1.8	2.8	1.9	3.1	2.8	2.5	3	2.7	1.8	2.3	1.8	2.5		2.4	2.4	2.1	3	2.7	2.3	2.8	1.8	2.2	2.6	2.5	2.8		2.4	2.7	1.7	1.3	1.2	2.5	2.7	2.5	2.4	1.1
	2.7	2.6	1.8	2.7	1.9	2.1	3.1	2	1.7	2.5	2.2	3.1		2.5	2.9	2.5	2.2	2.6	2	2.5	2.3	2.7	2.6	1.9	1.7		2.3	2.6	3	1.6	2.5	2.9	3	1.3	2.5	2.1	2.1	2.6		1.9	2.4	3.8	1.1	2.2	3	3	2.5	2.9	3.2
	2.7	2.9	2.6	2.6	2.8	2.1	1.7	2.6	1.5	1.9	2.5	1.3		2.3	1.8	2.4	2.3	2.6	2.6	2.5	2	2.3	2.9	3.1	1.8		2.5	2.7	2.4	2.2	1.6	2.8	2.9	1.8	2.9	2.1	3	2.2		2.2	2.6	2.7	3.4	2	2.5	2.9	2.9	2.9	2.7
	2.7	2.7	2.1	3	2.4	2.6	2	2.6	3	2.2	1.5	2.1		2.9	1.7	2.4	2.8	2.4	2.7	3.1	2.3	2	2.6	2.3	2.1		1.8	2.2	2.8	2.3	2.2	2.6	2.9	1.9	2.4	1.8	2.3	1.3		2.3	2	2.3	2.6	2.5	2.3	3	2.4	2.7	2.8
	2.6	1.9	2.9	2.8	2.9	3.4	2.4	2.1		2.7	2.8	1.2		2.5	3	2	2.4	2.5	2.6	2.5	2.8	2.7	2.8	1.6	2.7		2	2.6	2.7	2.9	2.8	3.2	1.2	2.9	2.8	2.3	2.8	3		2.9	2.2	3	2.1	2.7	1.8	2.3	2.6	2.1	3.1
	2.2		2.5	2.3	2.7	2.6	1.4	2.6		2.5	2.9	1.2		2.1		2	2.9	3.1	2.1	1.9	3.1	2.5	3.5	2.6	2.3		2.7	2.7	3	2.3	2.8	2.6	1.1	2.4	2.9	2.3	2.5	3.3		2.8	1.9	2.1	1.9	2.1	2.4	2.5	2.7	1.6	2.2
	2.7		2.6	2.7	2.3	2.3	2.2	1.7		2.2	2.7	2.2		3.2		2.2	2.3	2.5	1.5	2.6	2.6	1.7	2.6	2.9	1.9		2.4	3.2	3	1.6	2.5	2.4	1.3	2.4	2.8	3	2.7	1.5		1.9	2	1.5	2.6	2.4	2.4	2.6	2.1	1.6	2.4
	2.8		1.8	2.1	2.6	2.1	1.9	2.6		2.4	2.3	3.1		2.4		2.9	3.6	2.7	1.8	2.7	1.9	2.7	2.9	2.6	1.9		2.2	2.1	1.4	2.8	2.2	2.1	1.2	2.7	2.8	2.4	2.9			2.7	2.1	2.5	2.7	2	2.8	2.9	3.1	2.9	2.4
	2.6		1.7	2.7	2.9	2.4	2.6	2.7		2.8	3	3		2.4		1.8	2.8	2	3.2	2.9	1.3	2.7	2.5	2.7	2.8		1.8	2.7	2.7	2.8	1.7	2	0.7	3.6	2.4	2.5	2.4			1.8	1.4	1.8	2.6	2.5	2.6	3	1.3	2.5	2.7
	2.8		2.3	3.1		2.6	2.5	2.7		2.1		2.5		1.9		2.2	2.4	2.7	2.2	2.4	1.6	3.1	2	3.1	2.7		1.7	2.7	2.4	3		2.6	0.9	2.5	2.8	2.4	2.2			2.7	2.5	1.9		3	3	3.1	2.4	1.9	2.5
	1.6		1.6	2.1		2.2	1.7	2.2		1.8		2.2		2.7		2.5	1.8	1.8	1.5	2.3	2.3	2.5	2.2	1.7	2.9		1.9	1.8		2.3		1.9	2.9	2.8	2.3	2.3	2.3			2.4	3.1	2.4			2.2	2.8	1.9	2.6	3.1
	1.7			1.6		2.9	2.6	2.5		1.7		2.5		2.5		2.8	2.3		2		3.1	2.7	2.2	1.7	3.1			3		2.3		2.1	0.8	2.9	2.6	2.2	2.4			1.7	3	2.7			3.5		2.1	2.9	2.1
	1.3			2.3			2.9	2.6		2.4				2.8		3			1.4		1.8	1.6	2.4	1.9	2.4			1.8		2.1		2.5	1.2	2.8	2.2	2.6	2.3			1.7	2.5	2.1			3.1		2.4	2.1
	2.3						2.1	2.6						3.1		2					2.8	1.2	2.4	1.5	2.6			2.5		1.7		2.9		2.1		1.2	2.1				2.8	1.9						2.1
	1.6						1.8	2.2						1.6		2.5						2						3		1.9		2		2.4		1.5	1.6					4						2.4
							1.6	1.2								1.9						2								2.4		2.1		1.7		1.6	1.4					1.2
							2.3	2.3								1.8														2.2		2.4										1.8
							2.6									2.6																1.5
							2
Average	2.30952	2.61818	2.24118	2.48947	2.62	2.5	2.236	2.4	2.34	2.44211	2.44667	2.07222		2.39048	2.55455	2.4125	2.56111	2.53529	2.10526	2.47647	2.33	2.34091	2.46	2.28	2.4		2.30588	2.46667	2.4375	2.4	2.48667	2.35417	1.98421	2.4	2.59474	2.20455	2.25909	2.38462		2.44211	2.475	2.34783	2.52667	2.43125	2.57895	2.70588	2.29474	2.40952	2.46667
[truncated: 2 more columns]

## Sheet: Larval Growth (Day14)
	Day 14
	Plate 1	NRMv1												Plate 2	NRMv2												Plate 3	NRMv1												Plate 4	NRMv2
	well 1	well 2	well 3	well 4	well 5	well 6	well 7	well 8	well 9	well 10	well 11	well 12		well 1	well 2	well 3	well 4	well 5	well 6	well 7	well 8	well 9	well 10	well 11	well 12		well 1	well 2	well 3	well 4	well 5	well 6	well 7	well 8	well 9	well 10	well 11	well 12		well 1	well 2	well 3	well 4	well 5	well 6	well 7	well 8	well 9	well 10
	2.9	2.8	2.9	2.8	1.9	2	2.1	2.8	2.8	1.6	2.3	1.8		1.8	2.1	2.5	2.4	2.6	3	2.7	2.5	2.9	3.4	2.8	3.1		3.1	3	3.2		2.3	2.3	2.6	2.2	2.5	2.5	2.4	2.5		2.8	2.3	1.7	2.8	2.3	2.5	2.7	2.8	2.3	3.1
	2	1.6	2.9	1.7	1.5	2.6	2.6	2.5	2.8	1.9	2.5	2.6		2.6		2.1	2.4	2.6	2.9		2.5	2.5	2.6	3.3	2.8		2.2	2.6	2.5		2.2	2.8	2.1	3.2	3.3	2.9	2.8	2.7		2.4	2.6	2.8	2.9	2.6	3.1		2.1	2.4	2.8
	1.8		2.1	2.5		2.6	2.6		2.8	2.2	2.3	2.7		2.1		3.2	2.8		3		3.1	2.6	2.1	2.9	2.9		2.8	2.9				2.8		2.6		2.4	2.4	2.7		2.9	2.1	2.1	2.5	2.2	3.3		2.7	2	2.6
	2.4		1.9	1.6		2.4	2.6		3					2.4		2.3	1.8		3.1		3.1	2.7		2.5	2		2.2	2.6				1.8					2.3			3.1		2.3	1.3	2	3		2.5	2	2.9
	2.1		2.3			2.3	2.6		2.7					1.6		2.9			2.4		2.3	2.1		2.5	2.7			2.4									2.2			3		3	1.6				2.6	2.7
	1.9		2.8			2.4	3		2.5							2.6			2.1		2.4			2.2				2.7												2.3		1.8					3.2
			1.5			2.3	3.1		2.7							3			2.9		2.4							2														2.7					1.7
			2				2.7									2.8			2.2									2.8														3.5
							2.5									2.5												3.3														2.6
							2									2												3
							1.5									2.4
							3.2
							2.7
							2.3
							1.9
							2.4
							2.6
Average	2.18333	2.2	2.3	2.15	1.7	2.37143	2.49412	2.65	2.75714	1.9	2.36667	2.36667		2.1	2.1	2.57273	2.35	2.6	2.7	2.7	2.61429	2.56	2.7	2.7	2.7		2.575	2.73	2.85		2.25	2.425	2.35	2.66667	2.9	2.6	2.42	2.63333		2.75	2.33333	2.5	2.22	2.275	2.975	2.7	2.51429	2.28	2.85
																											0.204931													0.244112
[truncated: 2 more columns]

## Sheet: Head-width Measurements
Head Width (mm)
NRMv2	Conventional
0.302	0.303
0.253	0.296
0.275	0.318
0.303	0.242
0.277	0.231
0.265	0.286
0.275	0.287
0.319	0.282
0.306	0.286
0.26	0.305
0.309	0.361
0.309	0.325
0.272	0.245
0.303	0.304
0.274	0.309
0.342	0.293
